# Supplementary material for: Comprehensive Cytokine Profiling of Patients with COVID-19 Receiving Tocilizumab Therapy
Source: MDPI journal article supplement (doi:10.3390/ijms23147937), 2022-07-19
Supplement: s1 [file s1]

# Supplementary material

Table S1. Cytokine concentrations in clusters 1 and 2.

Data are presented as log2 of the normalized fluorescence values with median and interquartile range [Q25;Q75]. *P*-values are presented according to the Mann-Whitney test and with the Benjamini-Hochberg FDR correction for adjusted *p*-values.

N.Fl. - normalized fluorescence intensity; BH - Benjamini-Hochberg.

|             | Cluster 1<br>median,<br>log2(N.Fl.) | Cluster 1<br>[Q25;Q75],<br>log2(N.Fl.) | Cluster 2<br>median,<br>log2(N.Fl.) | Cluster 2<br>[Q25;Q75],<br>log2(N.Fl.) | Mann-Whitney p-<br>val | Mann-Whitney p-<br>val with BH<br>correction |
|-------------|-------------------------------------|----------------------------------------|-------------------------------------|----------------------------------------|------------------------|----------------------------------------------|
| PDGF-AA     | 11.7                                | [11.3;12.2]                            | 12.6                                | [12.0;13.3]                            | $1.30 \times 10^{-6}$  | $1.60 \times 10^{-6}$                        |
| PDGF-AB/BB  | 9.9                                 | [9.6;10.6]                             | 10.9                                | [10.3;11.7]                            | $1.10 \times 10^{-6}$  | $1.50 \times 10^{-6}$                        |
| IL-1b       | 4.4                                 | [4.3;4.5]                              | 4.9                                 | [4.7;5.1]                              | $1.60 \times 10^{-14}$ | $6.50 \times 10^{-13}$                       |
| IL-10       | 5.4                                 | [5.0;6.2]                              | 6.2                                 | [5.8;6.8]                              | $9.90 \times 10^{-5}$  | $1.10 \times 10^{-4}$                        |
| sCD40L      | 6.9                                 | [6.1;7.5]                              | 8.6                                 | [7.8;9.8]                              | $6.30 \times 10^{-9}$  | $1.20 \times 10^{-8}$                        |
| MIP-1b      | 6.8                                 | [6.2;7.1]                              | 7.7                                 | [7.0;8.1]                              | $2.60 \times 10^{-6}$  | $3.30 \times 10^{-6}$                        |
| IL-6        | 5.7                                 | [5.2;6.6]                              | 7                                   | [6.2;7.9]                              | $3.70 \times 10^{-8}$  | $5.90 \times 10^{-8}$                        |
| Fractalkine | 4.1                                 | [3.9;4.3]                              | 4.6                                 | [4.4;4.8]                              | $1.00 \times 10^{-9}$  | $2.70 \times 10^{-9}$                        |
| IL-8        | 6.3                                 | [6.0;6.7]                              | 7.3                                 | [7.0;7.6]                              | $5.20 \times 10^{-11}$ | $2.30 \times 10^{-10}$                       |
| MCP-1       | 11                                  | [10.1;11.4]                            | 11.9                                | [11.3;12.4]                            | $4.90 \times 10^{-6}$  | $6.00 \times 10^{-6}$                        |
| TNFa        | 5.8                                 | [5.5;6.2]                              | 6.3                                 | [6.1;6.5]                              | $4.40 \times 10^{-07}$ | $6.30 \times 10^{-07}$                       |
| IP-10       | 12.9                                | [12.0;13.6]                            | 13.4                                | [12.9;13.8]                            | $2.30 \times 10^{-02}$ | $2.40 \times 10^{-02}$                       |
| IL-2        | 4.5                                 | [4.3;4.6]                              | 4.9                                 | [4.7;5.2]                              | $4.00 \times 10^{-12}$ | $2.70 \times 10^{-11}$                       |
| MIP-1a      | 4.5                                 | [4.3;4.6]                              | 5.1                                 | [4.9;5.3]                              | $1.40 \times 10^{-13}$ | $1.90 \times 10^{-12}$                       |
| IL-3        | 4.8                                 | [4.4;5.1]                              | 5.4                                 | [5.2;5.8]                              | $1.50 \times 10^{-9}$  | $3.70 \times 10^{-9}$                        |
| IL-4        | 4.3                                 | [4.0;4.5]                              | 4.8                                 | [4.5;5.2]                              | $7.80 \times 10^{-10}$ | $2.30 \times 10^{-9}$                        |
| IL-17A      | 5                                   | [4.9;5.2]                              | 5.4                                 | [5.2;5.5]                              | $1.30 \times 10^{-8}$  | $2.20 \times 10^{-8}$                        |
| GM-CSF      | 4.5                                 | [4.3;4.6]                              | 5.1                                 | [4.9;5.3]                              | $1.20 \times 10^{-12}$ | $1.20 \times 10^{-11}$                       |
| EGF         | 5.7                                 | [5.2;6.4]                              | 7.4                                 | [6.4;8.1]                              | $8.20 \times 10^{-9}$  | $1.40 \times 10^{-8}$                        |
| FGF-2       | 4                                   | [3.9;4.3]                              | 4.5                                 | [4.3;4.8]                              | $1.80 \times 10^{-9}$  | $4.10 \times 10^{-9}$                        |
| Eotaxin     | 6.6                                 | [6.0;7.0]                              | 6.8                                 | [6.5;7.4]                              | $2.40 \times 10^{-02}$ | $2.40 \times 10^{-02}$                       |
| TGF-a       | 4.7                                 | [4.5;4.8]                              | 5.1                                 | [5.0;5.4]                              | $5.30 \times 10^{-12}$ | $3.00 \times 10^{-11}$                       |
| G-CSF       | 5.4                                 | [5.0;6.1]                              | 5.9                                 | [5.5;6.5]                              | $1.30 \times 10^{-03}$ | $1.40 \times 10^{-03}$                       |
| Flt-3L      | 4.6                                 | [4.4;4.9]                              | 4.9                                 | [4.7;5.1]                              | $7.50 \times 10^{-6}$  | $8.80 \times 10^{-6}$                        |
| IFNa2       | 4.2                                 | [4.1;4.5]                              | 4.7                                 | [4.5;4.9]                              | $1.50 \times 10^{-07}$ | $2.20 \times 10^{-07}$                       |
| IFNg        | 4.5                                 | [4.2;4.7]                              | 5.1                                 | [4.8;5.5]                              | $3.20 \times 10^{-9}$  | $6.10 \times 10^{-9}$                        |
| GRO         | 10.6                                | [9.8;11.2]                             | 11.8                                | [11.2;12.5]                            | $5.40 \times 10^{-8}$  | $8.30 \times 10^{-8}$                        |
| MCP-3       | 4.2                                 | [4.0;4.4]                              | 4.7                                 | [4.5;5.4]                              | $3.80 \times 10^{-10}$ | $1.30 \times 10^{-9}$                        |
| IL-12p40    | 4.5                                 | [4.4;4.7]                              | 4.9                                 | [4.7;5.1]                              | $2.80 \times 10^{-9}$  | $5.90 \times 10^{-9}$                        |
| MDC         | 8.4                                 | [7.8;8.9]                              | 8.4                                 | [8.0;8.7]                              | $4.70 \times 10^{-01}$ | $4.70 \times 10^{-01}$                       |
| IL-12p70    | 4.3                                 | [4.2;4.4]                              | 4.7                                 | [4.5;4.8]                              | $8.00 \times 10^{-10}$ | $2.30 \times 10^{-9}$                        |
| IL-13       | 4                                   | [3.8;4.2]                              | 4.5                                 | [4.2;4.7]                              | $2.30 \times 10^{-9}$  | $5.00 \times 10^{-9}$                        |
| IL-15       | 5                                   | [4.8;5.2]                              | 5.3                                 | [5.1;5.5]                              | $6.80 \times 10^{-07}$ | $9.40 \times 10^{-07}$                       |
| IL-1RA      | 5.5                                 | [4.9;6.3]                              | 6.3                                 | [5.8;6.9]                              | $3.40 \times 10^{-04}$ | $3.80 \times 10^{-04}$                       |
| IL-1a       | 4.9                                 | [4.7;5.2]                              | 5.6                                 | [5.3;5.9]                              | $6.10 \times 10^{-11}$ | $2.40 \times 10^{-10}$                       |
| IL-9        | 4.5                                 | [4.3;4.6]                              | 5.1                                 | [4.9;5.3]                              | $8.70 \times 10^{-14}$ | $1.70 \times 10^{-12}$                       |

|             |     |           |     |           |                        |                        |
|-------------|-----|-----------|-----|-----------|------------------------|------------------------|
| <b>IL-5</b> | 4.4 | [4.2;4.5] | 4.9 | [4.7;5.1] | $2.20 \times 10^{-11}$ | $1.10 \times 10^{-10}$ |
| <b>IL-7</b> | 4.2 | [4.0;4.5] | 4.7 | [4.5;4.9] | $1.50 \times 10^{-10}$ | $5.30 \times 10^{-10}$ |
| <b>TNFb</b> | 4.4 | [4.3;4.6] | 4.9 | [4.7;5.3] | $3.10 \times 10^{-9}$  | $6.10 \times 10^{-9}$  |
| <b>VEGF</b> | 4.3 | [4.1;4.5] | 5   | [4.7;5.4] | $2.90 \times 10^{-12}$ | $2.30 \times 10^{-11}$ |



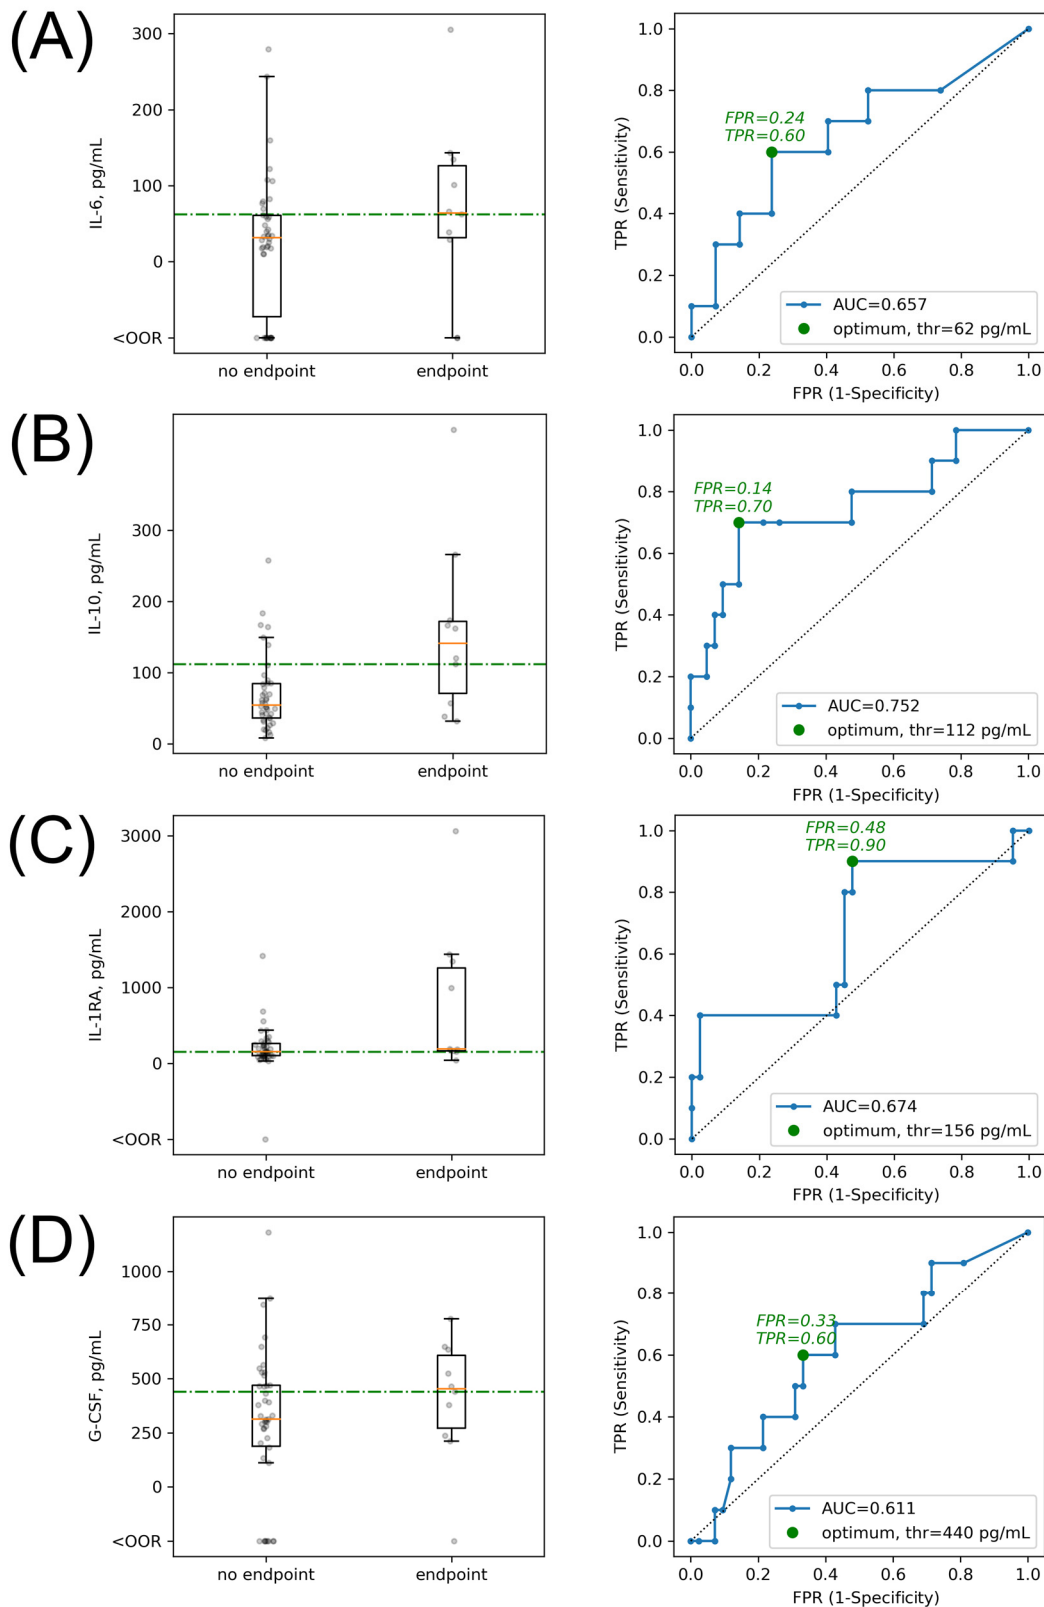

Figure S2. Boxplots for the absolute concentrations and ROC curves for selecting optimal concentration threshold for the cytokines. Presented are 4 cytokines prominently associated with clinical endpoints in patients with tocilizumab therapy. IL-6 (A). IL-10 (B). IL-1RA (C). G-CSF (D). OOR - out of range (< lower limit of detection).

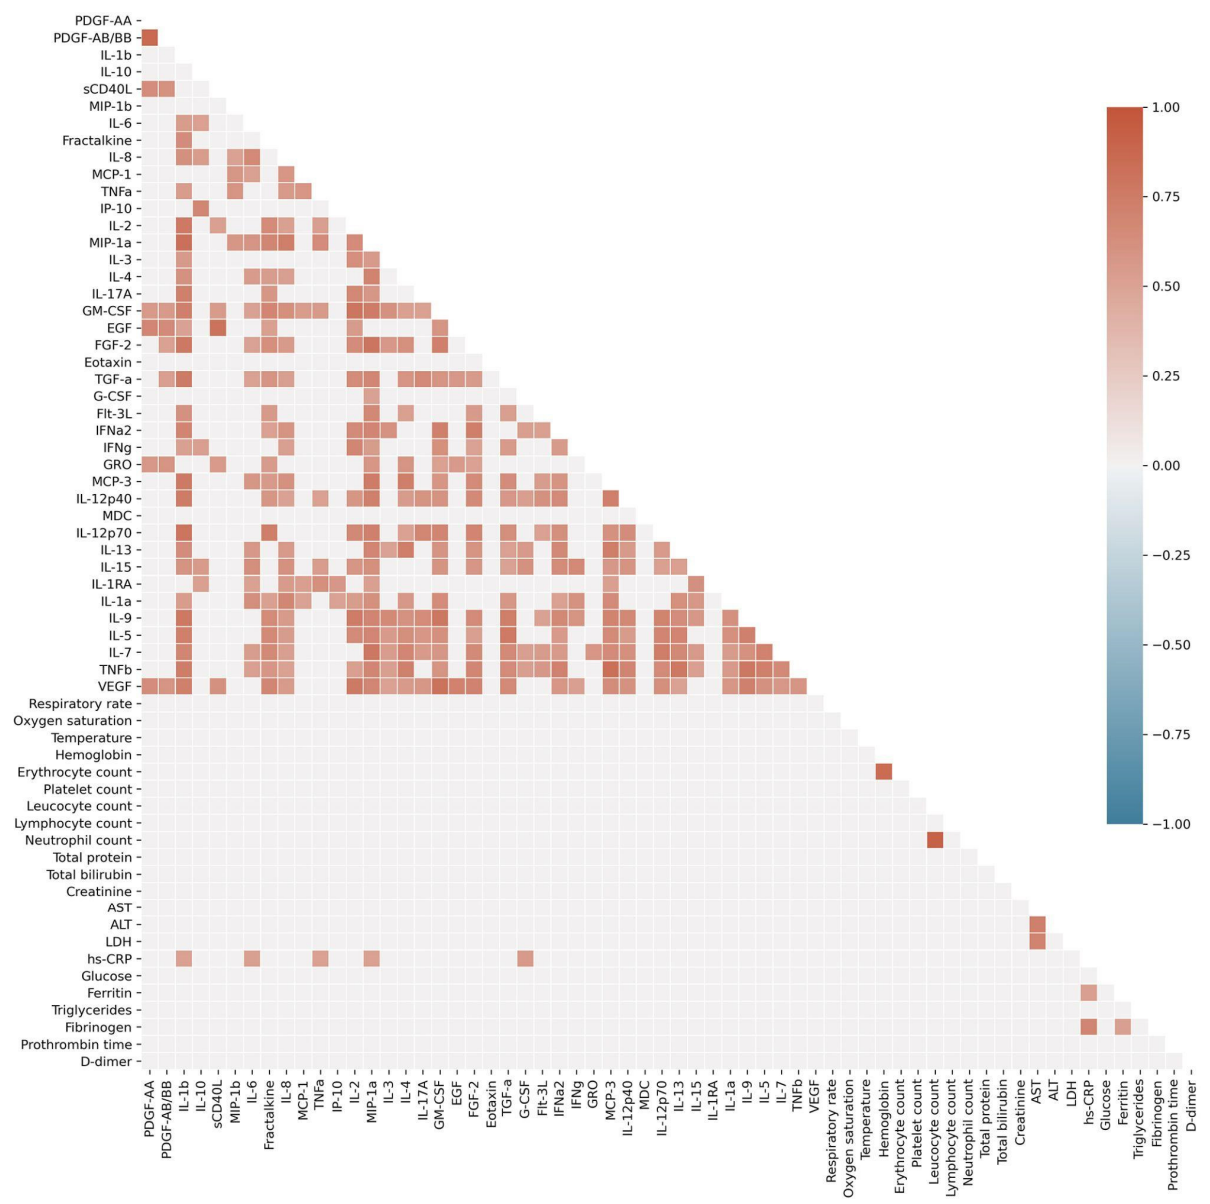

Figure S3. Correlation matrix of cytokines and laboratory parameters. Data are shown as Spearman correlations between cytokine levels and laboratory test results. Only correlations with coefficient > 0.5 and p-value < 0.05 are shown. For the cytokine levels log2 of the normalized fluorescence values are used.

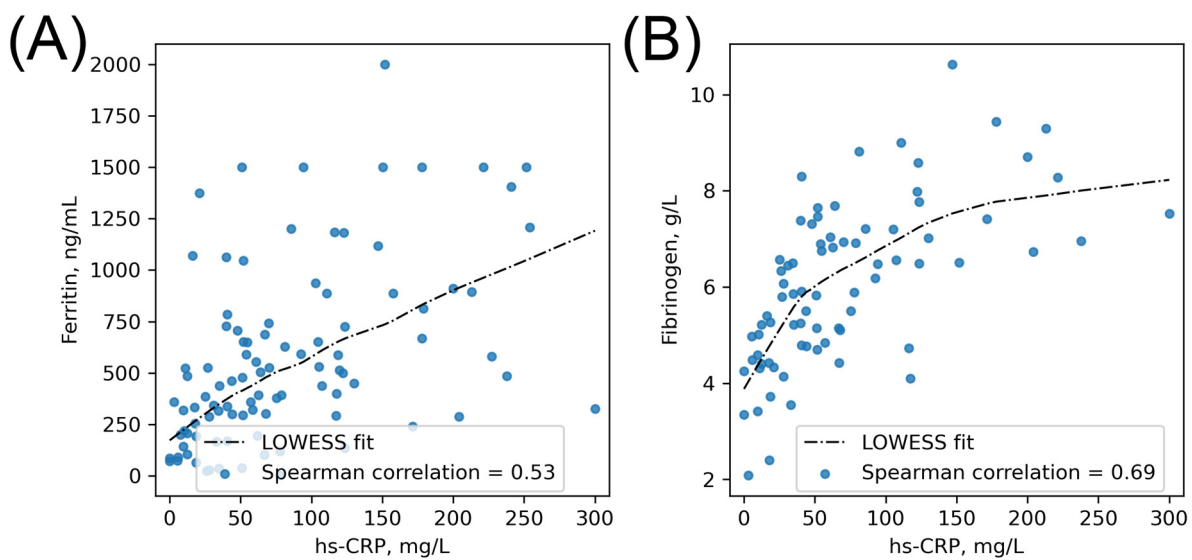

Figure S4. Correlation between hs-CRP and laboratory parameters. Ferritin vs hs-CRP (A). Fibrinogen vs hs-CRP (B). Data are shown as Spearman correlations.

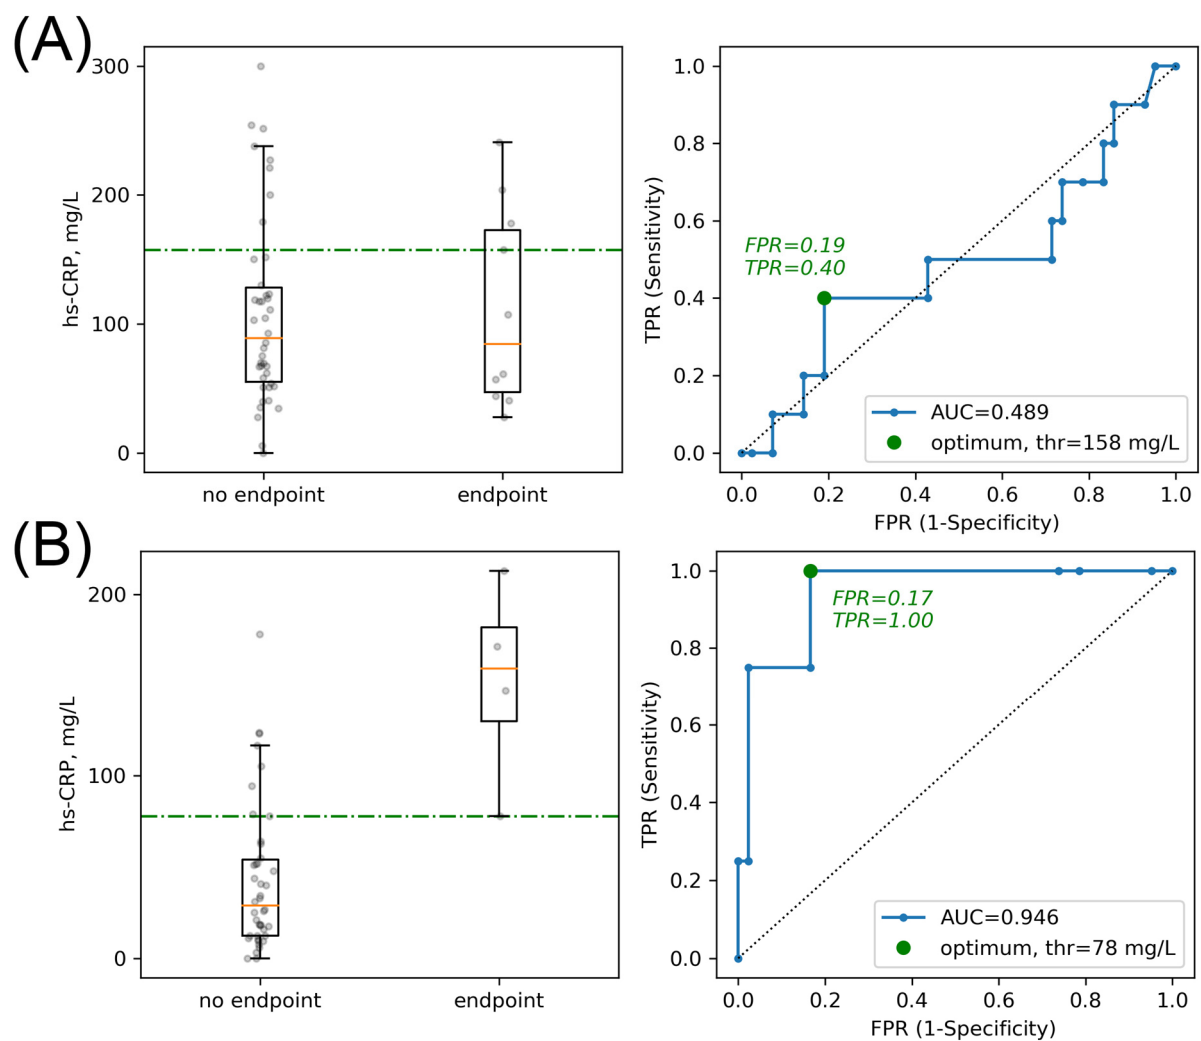

Figure S5. Boxplots for the absolute concentrations and ROC curves for selecting optimal concentration threshold for hs-CRP level. Patients with (A) and without tocilizumab therapy (B).
